# Supplementary material for: Differential regulation of node formation, nodal ciliogenesis and cilia positioning by Noto and Foxj1
Source: Oxford University Press journal article supplement (doi:10.1242/dev.072728), 2012-02-23
Supplement: dev072728tables1.pdf [file dev072728tables1.pdf]

**Table S1. Quantification of cilia position**

| Method used to determine cilia position |                                           | Wild type           | <i>Noto</i> <sup>GFP/GFP</sup> | <i>Noto</i> <sup>Foxj1/Foxj1</sup> | <i>Foxj1</i> <sup>-/-</sup> |
|-----------------------------------------|-------------------------------------------|---------------------|--------------------------------|------------------------------------|-----------------------------|
| Electron microscopy                     | Total number of cilia in <i>n</i> embryos | 103 in four embryos | 49 in eight embryos            | 99 in five embryos                 | 100 in five embryos         |
|                                         | Anterior                                  | 0<br>(0.0%)         | 8<br>(16.3%)                   | 8<br>(8.0%)                        | 8<br>(8.0%)                 |
|                                         | Posterior                                 | 78<br>(77.2%)       | 4<br>(8.2%)                    | 13<br>(13.0%)                      | 16<br>(16.0%)               |
|                                         | Middle                                    | 12<br>(11.9%)       | 27<br>(55.1%)                  | 49<br>(49.0%)                      | 50<br>(50.0%)               |
|                                         | Left                                      | 8<br>(7.9%)         | 7<br>(14.3%)                   | 12<br>(12.0%)                      | 14<br>(14.0%)               |
|                                         | Right                                     | 3<br>(3.0%)         | 3<br>(6.1%)                    | 18<br>(18.0%)                      | 11<br>(11.0%)               |
| Immuno-fluorescence staining            | Total number of cilia in <i>n</i> embryos | 251 in six embryos  | 147 in eight embryos           | 182 in seven embryos               | 156 in seven embryos        |
|                                         | Anterior                                  | 6<br>(2.4%)         | 21<br>(14.3%)                  | 23<br>(12.6%)                      | 15<br>(9.6%)                |
|                                         | Posterior                                 | 194<br>(77.3%)      | 19<br>(12.9%)                  | 25<br>(13.7%)                      | 24<br>(15.4%)               |
|                                         | Middle                                    | 25<br>(10.0%)       | 74<br>(50.3%)                  | 94<br>(51.6%)                      | 86<br>(55.1%)               |
|                                         | Left                                      | 12<br>(4.8%)        | 17<br>(11.6%)                  | 21<br>(11.5%)                      | 17<br>(10.9%)               |
|                                         | Right                                     | 14<br>(5.6%)        | 16<br>(10.9%)                  | 19<br>(10.4%)                      | 14<br>(9.0%)                |
